# Supplementary material for: Participatory Identification of Breeding Objectives and Selection Criteria for Begaria Cattle Breed
Source: MDPI journal article supplement (doi:10.3390/su141912766), 2022-10-07
Supplement: s1 [file s1]

# Supplementary material.

**Table S1.** Traits of interest for improvement across the location

| Traits          | Almahal        |                |                |                |                |      | Fanguso        |                |                |                |                |      | Mankush        |                |                |                |                |      | Overall | <i>P</i> value |
|-----------------|----------------|----------------|----------------|----------------|----------------|------|----------------|----------------|----------------|----------------|----------------|------|----------------|----------------|----------------|----------------|----------------|------|---------|----------------|
|                 | R <sub>1</sub> | R <sub>2</sub> | R <sub>3</sub> | R <sub>4</sub> | R <sub>5</sub> | I    | R <sub>1</sub> | R <sub>2</sub> | R <sub>3</sub> | R <sub>4</sub> | R <sub>5</sub> | I    | R <sub>1</sub> | R <sub>2</sub> | R <sub>3</sub> | R <sub>4</sub> | R <sub>5</sub> | I    | I       |                |
| Growth and size | 18             | 1              | 1              | 0              | 0              | 0.33 | 2              | 4              | 1              | 11             | 5              | 0.16 | 11             | 9              | 2              | 0              | 0              | 0.28 | 0.25    | 0.000          |
| High milk yield | 2              | 9              | 6              | 3              | 0              | 0.23 | 9              | 6              | 10             | 0              | 0              | 0.29 | 13             | 9              | 1              | 1              | 1              | 0.31 | 0.28    | 0.008          |
| Survival        | 1              | 4              | 9              | 3              | 1              | 0.18 | 0              | 0              | 2              | 1              | 0              | 0.02 | 1              | 1              | 11             | 3              | 1              | 0.14 | 0.11    | 0.913          |
| BCS             | -              | 5              | 4              | 5              | 3              | 0.15 | 5              | 2              | 1              | 3              | 1              | 0.13 | -              | 3              | 6              | 10             | 4              | 0.16 | 0.14    | 0.049          |
| Age at puberty  | 0              | 0              | 0              | 4              | 0              | 0.03 | 5              | 4              | -              | 7              | 0              | 0.16 | 0              | 0              | 1              | 5              | 2              | 0.04 | 0.09    | 0.115          |
| AFC             | -              | -              | -              | -              | 0              | 0.00 | -              | -              | -              | -              | 0              | 0.00 | -              | -              | -              | -              | 10             | 0.03 | 0.01    | 1              |
| CI              | -              | -              | -              | 1              | 0              | 0.01 | -              | -              | -              | 0              | 0              | 0.00 | -              | -              | -              | 0              | 1              | 0.00 | 0       | 0.157          |
| Color           | -              | 0              | -              | 2              | 12             | 0.05 | -              | 1              | -              | 1              | 10             | 0.05 | -              | 1              | -              | 2              | 2              | 0.03 | 0.08    | 0.221          |
| Aggressiveness  | -              | 0              | 0              | 2              | 1              | 0.02 | -              | 9              | 8              | 1              | 1              | 0.19 | -              | 0              | 0              | 1              | 1              | 0.01 | 0.04    | 0.014          |

R = rank, I = index, BCS = body condition score, AFC = age at first calving, CI = calving interval.

**Table S2.** Pearson correlation of selected traits (upper diagonal) and associated *p* values (below diagonal) for female Begaria cattle

|     | AFC    | BCS     | BL      | CI      | HG      | MY      | SUR     | UD     | UL     | WA     | NL      | NC     | LL     | BW     | LMY   |
|-----|--------|---------|---------|---------|---------|---------|---------|--------|--------|--------|---------|--------|--------|--------|-------|
| AFC |        | -0.05   | 0.06    | 0.06    | 0.09    | -0.20   | -0.02   | -0.10  | 0.10   | 0.04   | -0.08   | 0.09   | 0.14   | 0.11   | -0.14 |
| BCS | 0.4156 |         | 0.24    | -0.23   | 0.28    | 0.33    | 0.21    | 0.23   | 0.07+  | -0.51  | 0.17    | 0.12   | -0.13  | 0.35   | 0.27  |
| BL  | 0.3165 | 0.0001  |         | -0.18   | 0.20    | 0.14    | 0.05    | 0.07   | 0.07   | -0.15  | 0.23    | 0.05   | -0.06  | 0.60   | 0.09  |
| CI  | 0.3143 | 0.0002  | 0.0034  |         | -0.06   | -0.26   | -0.16   | -0.09  | 0.08   | 0.31   | -0.14   | 0.21   | 0.37   | -0.14  | 0.03  |
| HG  | 0.1485 | <0.0001 | 0.0013  | 0.3297  |         | 0.15    | 0.08    | 0.17   | 0.06   | -0.11  | 0.27    | 0.08   | -0.06  | 0.89   | 0.10  |
| MY  | 0.0013 | <0.0001 | 0.0224  | <.0001  | 0.0179  |         | 0.23    | 0.18   | -0.06  | -0.33  | 0.14    | 0.19   | -0.40  | 0.18   | 0.82  |
| SUR | 0.7382 | 0.0007  | 0.4264  | 0.0117  | 0.2081  | 0.0002  |         | 0.06   | 0.08   | -0.37  | 0.06    | 0.17   | 0.02   | 0.07   | 0.23  |
| UD  | 0.1111 | 0.0002  | 0.3019  | 0.1622  | 0.0072  | 0.0043  | 0.3040  |        | 0.25   | -0.06  | 0.16    | 0.02   | -0.18  | 0.16   | 0.12  |
| UL  | 0.1158 | 0.2554  | 0.2894  | 0.1795  | 0.3379  | 0.3261  | 0.2265  | <.0001 |        | -0.06  | -0.05   | -0.04  | 0.10   | 0.06   | 0.01  |
| WA  | 0.4803 | <0.0001 | 0.0156  | <0.0001 | 0.0700  | <0.0001 | <0.0001 | 0.2065 | 0.3396 |        | -0.07   | -0.08  | 0.11   | -0.16  | -0.27 |
| NL  | 0.1903 | 0.0056  | 0.0002  | 0.0286  | <0.0001 | 0.0296  | 0.3154  | 0.0121 | 0.3993 | 0.2674 |         | 0.08   | -0.13  | 0.32   | 0.06  |
| NC  | 0.1365 | 0.0606  | 0.4002  | 0.6501  | <0.0001 | 0.0019  | 0.0076  | 0.7134 | 0.5391 | 0.2290 | 0.1959  |        | -0.13  | 0.22   | 0.11  |
| LL  | 0.0256 | 0.0329  | 0.3766  | <0.0001 | 0.0179  | <0.0001 | 0.7817  | 0.0034 | 0.1163 | 0.0838 | 0.0350  | 0.0353 |        | -0.06  | 0.13  |
| BW  | 0.0924 | <0.0001 | <0.0001 | 0.0306  | <0.0001 | 0.0026  | 0.2443  | 0.0100 | 0.3468 | 0.0099 | <0.0001 | 0.0003 | 0.3428 |        | 0.13  |
| LMY | 0.1263 | 0.0022  | 0.8815  | 0.0002  | 0.0168  | <.0001  | 0.0037  | 0.0242 | 0.2230 | 0.0014 | 0.9506  | 0.1329 | 0.0319 | 0.2345 |       |

AFC = age at first calving, BCS = body condition score, BL = body length, CI = calving interval, HG = heart girth, MY = milk yield, LMY = lactation milk yield, SUR = survival rare to yearling, UD = udder depth, UL = udder length, WA = weaning age, NL= neck length, NC = neck circumference, LL = lactation length, BW = body weight.

**Table S3.** Pearson correlation of selected traits (upper diagonal) and associated *p* values (below diagonal) for male Begaria cattle

|     | BCS     | BL      | CC      | HG      | HW      | NL      | RW      | SC      | WA     | BW    |
|-----|---------|---------|---------|---------|---------|---------|---------|---------|--------|-------|
| BCS |         | 0.23    | 0.19    | 0.31    | 0.18    | 0.22    | 0.22    | 0.20    | -0.20  | 0.27  |
| BL  | 0.0002  |         | 0.57    | 0.69    | 0.73    | 0.55    | 0.56    | 0.20    | -0.10  | 0.85  |
| CC  | 0.0025  | <0.0001 |         | 0.63    | 0.60    | 0.51    | 0.59    | 0.44    | -0.16  | 0.65  |
| HG  | <0.0001 | <0.0001 | <0.0001 |         | 0.73    | 0.61    | 0.67    | 0.49    | -0.17  | 0.96  |
| HW  | 0.0038  | <0.0001 | <0.0001 | <0.0001 |         | 0.56    | 0.67    | 0.52    | -0.17  | 0.77  |
| NL  | 0.0005  | <0.0001 | <0.0001 | <0.0001 | <0.0001 |         | 0.49    | 0.52    | -0.16  | 0.63  |
| RW  | 0.0006  | <0.0001 | <0.0001 | <0.0001 | <0.0001 | <0.0001 |         | 0.59    | -0.21  | 0.68  |
| SC  | 0.0013  | <0.0001 | <0.0001 | <0.0001 | <0.0001 | <0.0001 | <0.0001 |         | -0.09  | 0.53  |
| WA  | 0.0015  | 0.1224  | 0.0112  | 0.0080  | 0.0077  | 0.0103  | 0.0006  | 0.1721  |        | -0.14 |
| BW  | <0.0001 | <0.0001 | <0.0001 | <0.0001 | <0.0001 | <0.0001 | <0.0001 | <0.0001 | 0.0256 |       |

BCS = body condition score, BL = body length, CC = canon circumference, HG = heart girth, HW = height at wither, NL = neck length, RW = rump width, SC = scrotal circumference, WA = weaning age, BW = body weight.
